# Supplementary material for: Development of Boron-Containing PVA-Based Cryogels with Controllable Boron Releasing Rate and Altered Influence on Osteoblasts
Source: MDPI journal article supplement (doi:10.3390/polym15071653), 2023-03-27
Supplement: s1 [file s1]

## **SUPPLEMENTARY MATERIAL**

### *Article*

## **Development of Boron-Containing PVA-Based Cryogels with Controllable Boron Releasing Rate and Altered Influence on Osteoblasts**

Seda Ceylan <sup>1,2</sup>, Ryan Dimmock <sup>2</sup> and Ying Yang <sup>2,\*</sup>

<sup>1</sup> Department of Bioengineering, Faculty of Engineering, Adana Alparslan Türkeş Science and Technology University, Adana, Turkey; sceylan@atu.edu.tr

<sup>2</sup> School of Pharmacy and Bioengineering, Keele University, Stoke on Trent, ST4 7QB UK; r.l.dimmock@keele.ac.uk

\* Correspondence: y.yang@keele.ac.uk; Tel.: 00441782674386

### ***Wound Closure Calculation***

Wound closure rate was calculated using Imagej programme. The area was calculated by using T0 and T24 and T48 time point and the results showed that the group 3 demonstrated clear cells aggregation within the scratch and along the scratch boundary. Group 4 and 5 showed no cell migration and closure rate was not linear or stable.

### **Supplementary Material 1: Table S1**

**Table S1.** Wound closure rate from scratch assay

| Scratch Area $\mu\text{m}^2$ |            |            |            |            |            | Wound Closure Ratio % |                       |               |               |                |
|------------------------------|------------|------------|------------|------------|------------|-----------------------|-----------------------|---------------|---------------|----------------|
|                              | G1         | G2         | G3         | G4         | G5         | %G1                   | %G2                   | %G3           | %G4           | %G5            |
| T0                           | 12.873.169 | 12.561.824 | 13.206.063 | 14.979.648 | 14.184.046 | can not be calculated | can not be calculated | 2.683.941.459 | 6.275.033.966 | 9.661.770.696  |
| T24                          |            |            | 12.851.62  | 14.039.67  | 12.813.616 | can not be calculated | can not be calculated | 1.404.182.508 | 3.423.627.478 | -3.390.924.154 |
| T42                          |            |            | 11.047.018 | 13.559.004 | 13.248.116 |                       |                       |               |               |                |

### **Supplementary Material 2: Figure S1**

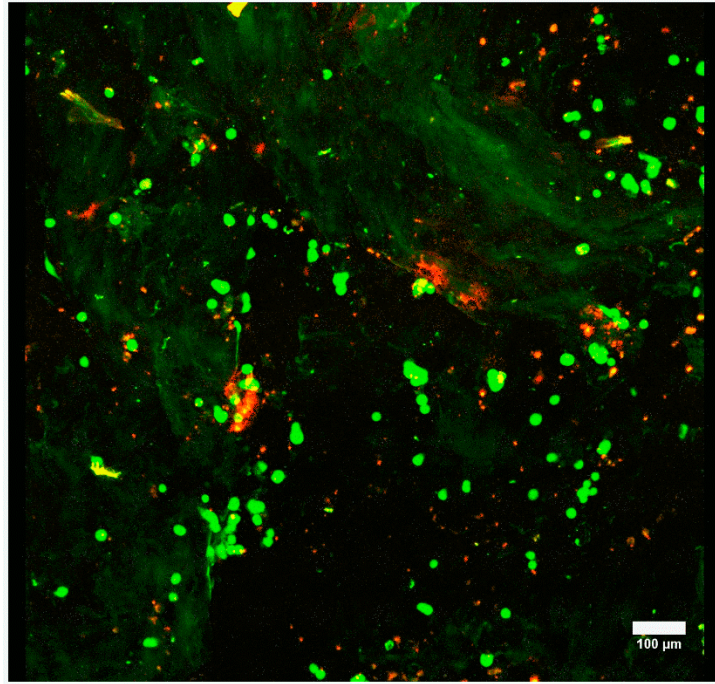

**Figure S1.** Representative fluorescence image of MG63 cells seeded on 100:0 3B cryogel scaffolds for 3 days culture through Live Dead assay. Green: Live, Red: Dead cells. Majority of cells were live and homogenously distributed with small portion dead cells.
